# Supplementary material
Source: ML conference proceedings conference paper supplement (https://proceedings.mlr.press/v161/fang21a.html)
Supplement: Supplementary file [file fang21a-supp.pdf]

---

# Supplementary Materials

---

**Huang Fang, Guanhua Fang, Tan Yu, Ping Li**

Cognitive Computing Lab  
Baidu Research  
10900 NE 8th St. Bellevue, Washington 98004, USA  
{fangazq877, fanggh2018, Tanyuynat, pingli98}@gmail.com

## 1 PROOFS

### Proof of Lemma 6.2

*Proof.* Given  $\mathbf{x} \in \mathbb{R}^d$ ,

$$\begin{aligned}
 \|\mathbf{x}\|_{\mathcal{B},1} &:= \sup_{\|\mathbf{z}\|_{\mathcal{B},\infty} \leq 1} \langle \mathbf{z}, \mathbf{x} \rangle \\
 &= \sup_{\mathbf{z} \in \mathbb{R}^d} \left\{ \langle \mathbf{z}, \mathbf{x} \rangle \mid \max_{i \in [k]} \frac{1}{\sqrt{|B_i|}} \|\mathbf{z}_{B_i}\|_2 \leq 1 \right\} \\
 &= \sup_{\mathbf{z} \in \mathbb{R}^d} \left\{ \sum_{i=1}^k \langle \mathbf{z}_{B_i}, \mathbf{x}_{B_i} \rangle \mid \frac{1}{\sqrt{|B_i|}} \|\mathbf{z}_{B_i}\|_2 \leq 1 \forall i \in [k] \right\} \\
 &= \sum_{i=1}^k \sup_{\mathbf{z} \in \mathbb{R}^d} \left\{ \langle \mathbf{z}_{B_i}, \mathbf{x}_{B_i} \rangle \mid \frac{1}{\sqrt{|B_i|}} \|\mathbf{z}_{B_i}\|_2 \leq 1 \right\} \\
 &\stackrel{(i)}{=} \sum_{i=1}^k \sqrt{|B_i|} \|\mathbf{x}_{B_i}\|_2.
 \end{aligned}$$

For (i), the maximum is attained when  $\mathbf{z}_{B_i} = \sqrt{|B_i|} \mathbf{x}_{B_i} / \|\mathbf{x}_{B_i}\|_2$ . □

### Proof of Theorem 6.5

*Proof.* We begin with Equation (6.1),

$$\text{Equation (6.1)} \leq f(\mathbf{x}^{(t)}) - \frac{1}{2L_{\max}} \left( \frac{\|\nabla f(\mathbf{x}^{(t)})\|_{\mathcal{B},\infty}}{\|\nabla f(\mathbf{x}^{(t)})\|_{\infty}} \right)^2 \|\nabla f(\mathbf{x}^{(t)})\|_{\infty}^2$$

The next step follows from the refined analysis of GCD from Nutini et al. (2015), we present it here for completeness. Since  $\mu_1$  is strongly convex, we have

$$f(\mathbf{x}) \geq f(\mathbf{y}) + \langle \nabla f(\mathbf{y}), \mathbf{x} - \mathbf{y} \rangle + \frac{\mu_1}{2} \|\mathbf{x} - \mathbf{y}\|_1^2, \forall \mathbf{x}, \mathbf{y} \in \mathbb{R}^d.$$

By minimizing left-hand and right-hand sides over  $\mathbf{x}$ , we get

$$\begin{aligned}
f^* &\geq f(y) - \sup_{\mathbf{x} \in \mathbb{R}^d} \left( \langle \nabla f(y), \mathbf{y} - \mathbf{x} \rangle - \frac{\mu_1}{2} \|\mathbf{y} - \mathbf{x}\|_1^2 \right) \\
&= f(y) - \left( \frac{\mu_1}{2} \|\cdot\|_1^2 \right)^* (\nabla f(y)) \\
&\stackrel{(i)}{=} f(y) - \frac{1}{2\mu_1} \|\nabla f(y)\|_\infty^2,
\end{aligned} \tag{1.1}$$

where (i) uses the fact that the convex conjugate of  $\frac{1}{2} \|\cdot\|_1^2$  is  $\frac{1}{2} \|\cdot\|_\infty^2$ . By subtracting  $f^*$  from left-hand and right-hand sides of Eq. (6.1) and combining with Eq. (1.1), we get

$$\begin{aligned}
&\mathbb{E} \left[ f(\mathbf{x}^{(t)}) - f^* \right] \\
&\leq \left( 1 - \frac{\mu_1}{L_{\max}} \frac{\|\nabla f(\mathbf{x}^{(t)})\|_{\mathcal{B}, \infty}^2}{\|\nabla f(\mathbf{x}^{(t)})\|_\infty^2} \right) \left( f(\mathbf{x}^{(t)}) - f^* \right).
\end{aligned} \tag{1.2}$$

Furthermore, with  $\frac{\|x\|_2^2}{d} \leq \|x\|_{\mathcal{B}, \infty}^2$  and Eq. (6.1), we get

$$\mathbb{E} \left[ f(\mathbf{x}^{(t)}) \right] \leq f(\mathbf{x}^{(t)}) - \frac{1}{2dL_{\max}} \|\nabla f(\mathbf{x}^{(t)})\|_2^2, \tag{1.3}$$

Using the same argument to derive Eq. (1.2) or following the standard analysis for randomized coordinate descent, we get

$$\begin{aligned}
&\mathbb{E} \left[ f(\mathbf{x}^{(t)}) - f^* \right] \\
&\leq \left( 1 - \frac{\mu_2}{L_{\max}} \frac{\|\nabla f(\mathbf{x}^{(t)})\|_{\mathcal{B}, \infty}^2}{\|\nabla f(\mathbf{x}^{(t)})\|_2^2} \right) \left( f(\mathbf{x}^{(t)}) - f^* \right).
\end{aligned} \tag{1.4}$$

We complete the proof by combining Eq. (1.2) and Eq. (1.4).  $\square$

### Proof of Theorem 6.6

*Proof.* We begin with Equation (6.1) and follow the standard proof template (Karimireddy et al., 2019; Dhillon et al., 2011),

$$\begin{aligned}
\mathbb{E}[f(\mathbf{x}^{(t+1)}) \mid \mathbf{x}^{(t)}] &\leq f(\mathbf{x}^{(t)}) - \frac{\eta^2}{2L_{\max}} \|\nabla f(\mathbf{x}^{(t)})\|_\infty^2 \\
&\stackrel{(i)}{\leq} f(\mathbf{x}^{(t)}) - \frac{\eta^2}{2L_{\max} \|\mathbf{x}^{(t)} - \mathbf{x}^*\|_1^2} (f(\mathbf{x}^{(t)}) - f^*)^2. \\
&\leq f(\mathbf{x}^{(t)}) - \frac{\eta^2}{2L_{\max} D^2} (f(\mathbf{x}^{(t)}) - f^*)^2.
\end{aligned}$$

where (i) is from the following inequality

$$f(\mathbf{x}^{(t)}) - f^* \leq \langle \mathbf{x}^* - \mathbf{x}^{(t)}, -\nabla f(\mathbf{x}^{(t)}) \rangle \leq \|\mathbf{x}^* - \mathbf{x}^{(t)}\|_1 \|\nabla f(\mathbf{x}^{(t)})\|_\infty.$$

Taking expectation on both sides,

$$\mathbb{E}[f(\mathbf{x}^{(t+1)})] \leq \mathbb{E}[f(\mathbf{x}^{(t)})] - \frac{\eta^2}{2L_{\max} D^2} (\mathbb{E}[f(\mathbf{x}^{(t)})] - f^*)^2,$$

Note that we use the fact that  $\mathbb{E}[X^2] \geq \mathbb{E}[X]^2$  to derive the above property. Denote  $\mathbb{E}[f(\mathbf{x}^{(t)})] - f^*$  as  $h_t$ , then we can get

$$h_{t+1} \leq h_t - \frac{\eta^2}{2L_{\max} D^2} h_t^2. \tag{1.5}$$

Dividing both side by  $h_{t+1}h_t$ , we get

$$\frac{1}{h_t} \leq \frac{1}{h_{t+1}} - \frac{\eta^2}{2L_{\max}D^2} \frac{h_t}{h_{t+1}} \stackrel{(i)}{\leq} \frac{1}{h_{t+1}} - \frac{\eta^2}{2L_{\max}D^2}, \quad (1.6)$$

where (i) is from the fact that  $\{h_t\}_{t=1}^{\infty}$  is a decreasing sequence and  $h_t/h_{t+1} \geq 1$ . Summing Equation (1.6) over  $t \in \{0, 1, \dots, T\}$ , we get

$$\begin{aligned} \frac{1}{h_0} - \frac{1}{h_T} &\leq -\frac{T\eta^2}{2L_{\max}D^2} \\ \implies h_T &\leq \frac{2L_{\max}D^2}{\eta^2T}, \end{aligned}$$

which completes the proof. □

### Proof of Theorem 6.7

*Proof.* Given any vector  $r$ , we let  $z_i = \mathbf{a}_i^T r$  and define  $m_j := \boldsymbol{\mu}_j^T r$ . Therefore,

$$\sum_{i \in B_j} z_i^2 = (m_j + z_i - m_j)^2 = |B_j|m_j^2 + 2m_j \sum_{i \in B_j} (z_i - m_j) + \sum_{i \in B_j} (z_i - m_j)^2. \quad (1.7)$$

According to Rudelson and Vershynin (2010), with probability at least  $1 - 2\exp\{-n/2\}$ , we have that

$$\sum_{i \in B_j} (z_i - m_j)^2 = \|\tilde{A}_{B_j} r\|^2 \geq (\sqrt{|B_j|} - 2\sqrt{n})^2 \|r\|_2^2 \sigma^2$$

and

$$\left| \sum_{i \in B_j} (z_i - m_j) \right| \leq \sigma \|r\|_2 \sqrt{|B_j| n \log n}$$

hold for all  $r$ . Here  $\tilde{A}_{B_j}$  is the  $j$ th-block submatrix of  $A$  by shifting mean to zero. Therefore, we have

$$\sum_{i \in B_j} z_i^2 \geq |B_j|m_j^2 - 2m_j\sigma\|r\|_2\sqrt{|B_j|n\log n} + (\sqrt{|B_j|} - 2\sqrt{n})^2\|r\|_2^2\sigma^2 \quad (1.8)$$

by simplifying (1.7). On the other hand,

$$\max_{i \in B_j} |z_i| = \max_{i \in B_j} |\boldsymbol{\mu}_j^T r + (\mathbf{a}_i - \boldsymbol{\mu}_j)^T r| \leq m_j + \max_{i \in B_j} |(\mathbf{a}_i - \boldsymbol{\mu}_j)^T r| \leq m_j + 2 \log |B_j| \sqrt{n} \|r\|_2 \sigma$$

holds with probability at least  $1 - 2|B_j| \exp\{-n/4\}$ . Thus, when  $|B_j| \gg n$ , we get

$$\begin{aligned} &\frac{\sqrt{\sum_{i \in B_j} z_i^2}}{\max_{i \in B_j} |z_i|} \\ &\geq \frac{\sqrt{|B_j|m_j^2 - 2m_j\sigma\|r\|_2\sqrt{|B_j|n\log n} + (\sqrt{|B_j|} - 2\sqrt{n})^2\|r\|_2^2\sigma^2}}{m_j + 2 \log |B_j| \sqrt{n} \|r\|_2 \sigma} \\ &\geq \frac{c\sqrt{|B_j|}\sqrt{m_j^2 + \|r\|_2^2\sigma^2}}{\log |B_j| \sqrt{n} \sqrt{m_j^2 + \|r\|_2^2\sigma^2}} \\ &= c\sqrt{|B_j|}/(\log |B_j| \sqrt{n}) \end{aligned} \quad (1.9)$$

$$= c\sqrt{|B_j|}/(\log |B_j| \sqrt{n}) \quad (1.10)$$

for some universal constant  $c$ . Notice that the above results hold for all  $r$ . This implies that

$$\frac{\|\nabla_{B_j} f\|_2 / \sqrt{|B_j|}}{\|\nabla_{B_j} f\|_{\infty}} \geq \frac{c}{\log |B_j| \sqrt{n}}, \quad (1.11)$$

if we specifically take  $r = f'(A\mathbf{x}^t)$ . This further gives

$$\|\nabla f(\mathbf{x}^t)\|_{\mathcal{B},\infty} \geq \frac{c}{\max_j \log |B_j| \sqrt{n}} \|\nabla f(\mathbf{x}^t)\|_{\infty},$$

When  $\max_j |B_j| \geq d/k \gg n$ , there is huge improvement in lower bound, from  $1/(\max_j \sqrt{|B_j|})$  to  $1/(\max_j \log |B_j| \sqrt{n})$ . This concludes the proof.  $\square$

### Proof of Theorem 6.10

*Proof.* We first show that  $\|\mathbf{c}_j - \boldsymbol{\mu}_j\| \leq \delta \sqrt{n}$ . We compare the difference between  $k$ th coordinates of  $\mathbf{c}_j$  and  $\boldsymbol{\mu}_j$ . Then

$$\begin{aligned} |\mathbf{c}_j(k) - \boldsymbol{\mu}_j(k)| &= \frac{1}{|B_j|} \left| \sum_{i \in B_j} A_{ik} - \boldsymbol{\mu}_j(k) \right| \\ &\leq \frac{1}{|B_j|} \left( \left| \sum_{i \in B_j \cap B_j^*} (A_{ik} - \boldsymbol{\mu}_j(k)) \right| + \left| \sum_{i \in B_j \cap B_j^{*c}} (A_{ik} - \boldsymbol{\mu}_j(k)) \right| \right) \\ &\leq \frac{C_1 \log |B_j| \sqrt{|B_j \cap B_j^*|}}{|B_j|} + \frac{|B_j \cap B_j^{*c}|}{|B_j|} (\mu_{gap} + \sigma \log |B_j|), \\ &:= \delta_j. \end{aligned} \tag{1.12}$$

holds with probability at least  $1 - \frac{1}{|B_j|}$ , where  $\mu_{gap} := \max_{k \in [n]} \max_{j_1 \neq j_2} |\boldsymbol{\mu}_{j_1}(k) - \boldsymbol{\mu}_{j_2}(k)|$  and  $B_j^{*c}$  is the complement of  $B_j^*$ . By assumption A1, it can be checked that  $\delta_j \leq 2\sigma$  when  $|B_j| \gg n$ . Here, (1.12) holds since that  $\sum_{i \in B_j \cap B_j^{*c}} (A_{ik} - \boldsymbol{\mu}_j(k))$  is a Gaussian random variable which is  $O_p(\sqrt{|B_j \cap B_j^{*c}|})$ . For each  $i \in B_j \cap B_j^{*c}$ , the difference between  $A_{ik}$  and  $\boldsymbol{\mu}_j(k)$  is at most  $|\boldsymbol{\mu}_{j_i}(k) - \boldsymbol{\mu}_j(k)|$  plus noise term, which is further bounded by  $\mu_{gap} + \sigma \log |B_j|$ .

We next compute the lower bound of  $\sum_{i \in B_j} z_i^2$ . By use of (1.8), we get

$$\sum_{i \in B_j} z_i^2 \geq \sum_{i \in B_j \cap B_j^*} z_i^2 = |B_j \cap B_j^*| m_j^2 - 2m_j \sigma \|r\|_2 \sqrt{|B_j \cap B_j^*| n \log n} + (\sqrt{|B_j \cap B_j^*|} - 2\sqrt{n})^2 \|r\|_2^2 \sigma^2. \tag{1.13}$$

We further calculate the upper bound of  $\max_{i \in B_j} |z_i|$ .

$$\begin{aligned} \max_{i \in B_j} |z_i| &= \max \left\{ \max_{i \in B_j \cap B_j^*} |z_i|, \max_{i \in B_j \cap B_j^{*c}} |z_i| \right\} \\ &\leq \max \left\{ m_j + 2 \log |B_j| \sqrt{n} \|r\|_2 \sigma, \max_{i \in B_j \cap B_j^{*c}} |z_i| \right\} \\ &= \max \left\{ m_j + 2 \log |B_j| \sqrt{n} \|r\|_2 \sigma, \max_{i \in B_j \cap B_j^{*c}} |\mathbf{c}_j^T r - \boldsymbol{\mu}_j^T r + \boldsymbol{\mu}_j^T r + (\mathbf{a}_i - \mathbf{c}_j)^T r| \right\} \\ &\leq \max \left\{ m_j + 2 \log |B_j| \sqrt{n} \|r\|_2 \sigma, \sqrt{n} \delta_j \|r\| + m_j + \max_{i \in B_j \cap B_j^{*c}} |(\mathbf{a}_i - \mathbf{c}_j)^T r| \right\} \\ &\leq \max \left\{ m_j + 2 \log |B_j| \sqrt{n} \|r\|_2 \sigma, \sqrt{n} \delta_j \|r\| + m_j + \max_{i \in B_j^*} C |(\mathbf{a}_i - \mathbf{c}_j)^T r| \right\} \\ &\leq \max \left\{ m_j + 2 \log |B_j| \sqrt{n} \|r\|_2 \sigma, \sqrt{n} (C + 1) \delta_j \|r\| + m_j + 2C \log |B_j^*| \sqrt{n} \|r\|_2 \sigma \right\} \\ &\leq m_j + \sqrt{n} (C + 1) \delta_j \|r\| + 2C \log |B_j^*| \sqrt{n} \|r\|_2 \sigma. \end{aligned} \tag{1.14}$$

By (1.13) and (1.14), when  $|B_j| \gg n$ , we get

$$\begin{aligned}
& \frac{\sqrt{\sum_{i \in B_j} z_i^2}}{\max_{i \in B_j} |z_j|} \\
& \geq \frac{\sqrt{|B_j \cap B_j^*| m_j^2 - 2m_j \sigma \|r\|_2 \sqrt{|B_j \cap B_j^*| n \log n} + (\sqrt{|B_j \cap B_j^*|} - 2\sqrt{n})^2 \|r\|_2^2 \sigma^2}}{m_j + \sqrt{n}(C+1)\delta_j \|r\| + 2C \log |B_j^*| \sqrt{n} \|r\|_2 \sigma} \\
& \geq \frac{c \sqrt{|B_j \cap B_j^*|} \sqrt{m_j^2 + \|r\|_2^2 \sigma^2}}{\max\{C \log |B_j^*|, C+1\} \sqrt{n} \sqrt{m_j^2 + \|r\|_2^2 \sigma^2} + \|r\|_2^2 \delta_j^2} \\
& \geq c \sqrt{|B_j|} / (C(\log |B_j^*| + 1) \sqrt{n})
\end{aligned} \tag{1.15}$$

by adjusting some universal constant  $c$ . Notice that the above results hold for all  $r$ . This implies that

$$\frac{\|\nabla_{B_j} f\|_2 / \sqrt{|B_j|}}{\|\nabla_{B_j} f\|_\infty} \geq \frac{c}{C(\log |B_j^*| + 1) \sqrt{n}}. \tag{1.16}$$

This further gives

$$\|\nabla f(\mathbf{x}^t)\|_{\mathcal{B}, \infty} \geq \frac{c}{C \max_j (\log |B_j^*| + 1) \sqrt{n}} \|\nabla f(\mathbf{x}^t)\|_\infty,$$

When  $\max_j |B_j| \geq d/k \gg n$ , there is huge improvement in lower bound, from  $1/(\max_j \sqrt{|B_j|})$  to  $1/(C(\log |B_j^*| + 1) \sqrt{n})$ .  $\square$

### Proof of Theorem 6.11

Our proof follows the same pattern as the proof of ASCD (Lu et al., 2018).

**Lemma 1.1.** Define  $\mathbf{s}^{(t+1)} := \mathbf{y}^{(t)} - \frac{1}{dL_{\max}} \nabla f(\mathbf{y}^{(t)})$ , then

$$\mathbb{E}_t f(\mathbf{x}^{(t)}) \leq f(\mathbf{y}^{(t)}) + \langle \nabla f(\mathbf{y}^{(t)}), \mathbf{s}^{(t+1)} - \mathbf{y}^{(t)} \rangle + \frac{dL_{\max}}{2} \|\mathbf{s}^{(t+1)} - \mathbf{y}^{(t)}\|^2.$$

*Proof.*

$$\mathbb{E}_t f(\mathbf{x}^{(t+1)}) \leq f(\mathbf{y}^{(t)}) - \frac{1}{2L_{\max}} \mathbb{E}_t (\nabla_{j_1} f(\mathbf{y}^{(t)}))^2 \tag{1.17}$$

$$\leq f(\mathbf{y}^{(t)}) - \frac{1}{2dL_{\max}} \|\nabla f(\mathbf{y}^{(t)})\|^2 \tag{1.18}$$

$$= f(\mathbf{y}^{(t)}) + \langle \nabla f(\mathbf{y}^{(t)}), \mathbf{s}^{(t+1)} - \mathbf{y}^{(t)} \rangle + \frac{dL_{\max}}{2} \|\mathbf{s}^{(t+1)} - \mathbf{y}^{(t)}\|^2 \tag{1.19}$$

Here, (1.18) holds due to the following fact,

$$\begin{aligned}
\mathbb{E}_t |\nabla_{j_1} f(\mathbf{y}^{(t)})|^2 &= \mathbb{E}_t \max_j |\nabla_{i_j} f(\mathbf{y}^{(t)})|^2 \\
&\geq \mathbb{E}_t \sum_j \frac{|B_j|}{d} |\nabla_{i_j} f(\mathbf{y}^{(t)})|^2 \\
&= \sum_j \frac{|B_j|}{d} \mathbb{E}_t |\nabla_{i_j} f(\mathbf{y}^{(t)})|^2 \\
&= \sum_j \frac{|B_j|}{d} \frac{1}{|B_j|} |\nabla_{B_j} f(\mathbf{y}^{(t)})|^2 \\
&= \frac{1}{d} \|\nabla f(\mathbf{y}^{(t)})\|^2.
\end{aligned}$$

$\square$

**Lemma 1.2.** Define  $\mathbf{t}^{(t+1)} := \mathbf{z}^{(t)} - \frac{1}{n\theta_t} L_{\max}^{-1} \nabla f(\mathbf{y}^{(t)})$ . Or equivalently,

$$\mathbf{t}^{(t+1)} := \arg \min_{\mathbf{z}} \langle \nabla f(\mathbf{y}^{(t)}), \mathbf{z} - \mathbf{z}^{(t)} \rangle + \frac{d\theta_t L_{\max}}{2} \|\mathbf{z} - \mathbf{z}^{(t)}\|^2.$$

Then

$$\mathbb{E}_t f(\mathbf{x}^{(t+1)}) \leq (1 - \theta_t) f(\mathbf{x}^{(t)}) + \theta_t f(\mathbf{x}^*) + \frac{nL_{\max}\theta_t^2}{2} \|\mathbf{x}^* - \mathbf{z}^{(t)}\|^2 - \frac{nL_{\max}\theta_t^2}{2} \|\mathbf{x}^* - \mathbf{t}^{(t+1)}\|^2.$$

*Proof.* By Lemma 1.1, we have

$$\begin{aligned} \mathbb{E}_t f(\mathbf{x}^{(t)}) &\leq f(\mathbf{y}^{(t)}) + \langle \nabla f(\mathbf{y}^{(t)}), \mathbf{s}^{(t+1)} - \mathbf{y}^{(t)} \rangle + \frac{dL_{\max}}{2} \|\mathbf{s}^{(t+1)} - \mathbf{y}^{(t)}\|^2 \\ &= f(\mathbf{y}^{(t)}) + \theta_t (\langle \nabla f(\mathbf{y}^{(t)}), \mathbf{t}^{(t+1)} - \mathbf{z}^{(t)} \rangle + \frac{dL_{\max}\theta_t}{2} \|\mathbf{t}^{(t+1)} - \mathbf{z}^{(t)}\|^2) \\ &= f(\mathbf{y}^{(t)}) + \theta_t (\langle \nabla f(\mathbf{y}^{(t)}), \mathbf{x}^* - \mathbf{z}^{(t)} \rangle + \frac{dL_{\max}\theta_t}{2} \|\mathbf{x}^* - \mathbf{z}^{(t)}\|^2 - \frac{dL_{\max}L\theta_t}{2} \|\mathbf{x}^* - \mathbf{t}^{(t+1)}\|) \\ &= (1 - \theta_t) (f(\mathbf{y}^{(t)}) + \langle \nabla f(\mathbf{y}^{(t)}), \mathbf{x}^{(t)} - \mathbf{y}^{(t)} \rangle) + \theta_t (f(\mathbf{y}^{(t)}) + \langle \nabla f(\mathbf{y}^{(t)}), \mathbf{x}^* - \mathbf{y}^{(t)} \rangle) \\ &\quad + \frac{nL_{\max}\theta_t^2}{2} \|\mathbf{x}^* - \mathbf{z}^{(t)}\|^2 - \frac{nL_{\max}\theta_t^2}{2} \|\mathbf{x}^* - \mathbf{t}^{(t+1)}\|^2 \\ &\leq (1 - \theta_t) f(\mathbf{x}^{(t)}) + \theta_t f(\mathbf{x}^*) + \frac{nL_{\max}\theta_t^2}{2} \|\mathbf{x}^* - \mathbf{z}^{(t)}\|^2 - \frac{nL_{\max}\theta_t^2}{2} \|\mathbf{x}^* - \mathbf{t}^{(t+1)}\|^2. \end{aligned}$$

□

**Lemma 1.3.**  $\frac{dL_{\max}}{2} \|\mathbf{x}^* - \mathbf{z}^{(t)}\|^2 - \frac{dL_{\max}}{2} \|\mathbf{x}^* - \mathbf{t}^{(t+1)}\|^2 = \frac{d^2 L_{\max}}{2} \|\mathbf{x}^* - \mathbf{z}^{(t)}\|^2 - \frac{d^2 L_{\max}}{2} \mathbb{E}_{j_2} \|\mathbf{x}^* - \mathbf{z}^{(t+1)}\|^2$ .

*Proof.*

$$\begin{aligned} \frac{dL_{\max}}{2} \|\mathbf{x}^* - \mathbf{z}^{(t)}\|^2 - \frac{dL_{\max}}{2} \|\mathbf{x}^* - \mathbf{t}^{(t+1)}\|^2 &= \frac{dL_{\max}}{2} \langle \mathbf{t}^{(t+1)} - \mathbf{z}^{(t)}, 2\mathbf{x}^* - 2\mathbf{z}^{(t)} \rangle - \frac{dL_{\max}}{2} \|\mathbf{t}^{(t+1)} - \mathbf{z}^{(t)}\|^2 \\ &= \frac{d^2 L_{\max}}{2} \mathbb{E}_{j_2} [\langle \mathbf{z}^{(t+1)} - \mathbf{z}^{(t)}, 2\mathbf{x}^* - 2\mathbf{z}^{(t)} \rangle - \|\mathbf{z}^{(t+1)} - \mathbf{z}^{(t)}\|^2] \quad (1.20) \\ &= \frac{d^2 L_{\max}}{2} \|\mathbf{x}^* - \mathbf{z}^{(t)}\|^2 - \frac{d^2 L_{\max}}{2} \mathbb{E}_{j_2} \|\mathbf{x}^* - \mathbf{z}^{(t+1)}\|^2. \quad (1.21) \end{aligned}$$

Here, we use the fact that  $\mathbf{t}^{(t+1)} - \mathbf{z}^{(t)} = d\mathbb{E}_{j_2} [\mathbf{z}^{(t+1)} - \mathbf{z}^{(t)}]$  and  $\|\mathbf{t}^{(t+1)} - \mathbf{z}^{(t)}\|^2 = d\mathbb{E}_{j_2} \|\mathbf{z}^{(t+1)} - \mathbf{z}^{(t)}\|^2$ . □

*Proof of Theorem 6.11.* By Lemma 1.2 and Lemma 1.3, we obtain that

$$\mathbb{E}_t f(\mathbf{x}^{(t+1)}) \leq (1 - \theta_t) f(\mathbf{x}^{(t)}) + \theta_t f(\mathbf{x}^*) + \frac{d^2 \theta_t^2 L_{\max}}{2} \|\mathbf{x}^* - \mathbf{z}^{(t)}\|^2 - \frac{d^2 \theta_t^2 L_{\max}}{2} \mathbb{E}_{j_2} \|\mathbf{x}^* - \mathbf{z}^{(t+1)}\|^2.$$

By using  $\frac{1 - \theta_{t+1}}{\theta_{t+1}^2} = \frac{1}{\theta_t^2}$ , we arrive at:

$$\frac{1 - \theta_{t+1}}{\theta_{t+1}^2} (\mathbb{E}_t f(\mathbf{x}^{(t+1)}) - f(\mathbf{x}^*)) + \frac{d^2 L_{\max}}{2} \mathbb{E}_{j_2} \|\mathbf{x}^* - \mathbf{z}^{(t+1)}\|^2 \leq \frac{1 - \theta_t}{\theta_t^2} (f(\mathbf{x}^t) - f(\mathbf{x}^*)) + \frac{d^2 L_{\max}}{2} \|\mathbf{x}^* - \mathbf{z}^t\|^2$$

We use  $\mathbb{E}^t$  to denote taking expectation over everything up to  $t$ , it follows that

$$\mathbb{E}^{t+1} \left[ \frac{1 - \theta_{t+1}}{\theta_{t+1}^2} (f(\mathbf{x}^{(t+1)}) - f(\mathbf{x}^*)) + \frac{d^2 L_{\max}}{2} \|\mathbf{x}^* - \mathbf{z}^{(t+1)}\|^2 \right] \leq \mathbb{E}^t \left[ \frac{1 - \theta_t}{\theta_t^2} (f(\mathbf{x}^t) - f(\mathbf{x}^*)) + \frac{d^2 L_{\max}}{2} \|\mathbf{x}^* - \mathbf{z}^t\|^2 \right].$$

By above recursive formula, we get

$$\mathbb{E}^{t+1} \left[ \frac{1 - \theta_{t+1}}{\theta_{t+1}^2} (f(\mathbf{x}^{(t+1)}) - f(\mathbf{x}^*)) \right] \leq \mathbb{E}^0 \left[ \frac{1 - \theta_0}{\theta_0^2} (f(\mathbf{x}^0) - f(\mathbf{x}^*)) + \frac{d^2 L_{\max}}{2} \|\mathbf{x}^* - \mathbf{z}^0\|^2 \right] \quad (1.22)$$

$$= \frac{d^2 L_{\max}}{2} \|\mathbf{x}^* - \mathbf{x}^0\|^2 \quad (1.23)$$

---

**Algorithm 1** Proximal hybrid coordinate descent

---

**Input:**  $\mathbf{x}^{(0)}, \mathcal{B} = \{B_i\}_{i=1}^k$ .  
**for**  $t = 0, 1, 2, \dots$  **do**  
     $I = \emptyset$   
    **for**  $j = 1, 2, \dots, k$  **do**  
        [Random rule] uniform randomly choose a  $i_j \in B_j$  and let  $I = I \cup \{i_j\}$   
    **end for**  
    [GS-s rule]  $i \in \arg \max_{j \in I} \{\min_{s \in g_i} |\nabla_j f(\mathbf{x}^t) + s|\}$   
     $\mathbf{x}^{(t+1)} = \text{prox}_{1/L_i g_i} \left( \mathbf{x}^{(t)} - \frac{1}{L_i} \nabla f_i(\mathbf{x}^{(t)}) \mathbf{e}_i \right)$   
**end for**

---

It is easy to check that  $\theta_t \leq \frac{2}{t+2}$ , then it gives

$$\mathbb{E}^t \left[ f(\mathbf{x}^{(t)}) - f(\mathbf{x}^*) \right] \leq \frac{\theta_t^2}{1 - \theta_t} \frac{d^2 L_{\max}}{2} \|\mathbf{x}^* - \mathbf{x}^0\|^2 = \frac{d^2 \theta_{t-1}^2 L_{\max}}{2} \|\mathbf{x}^* - \mathbf{x}^0\|^2 \leq \frac{2d^2 L_{\max}}{(t+1)^2} \|\mathbf{x}^* - \mathbf{x}^0\|^2.$$

□

### High probability error bounds

The following high probability error bounds can be obtained by using (Richtárik and Takác, 2014, Theorem 1)

**Corollary 1.4.** Denote  $\mathbf{x}^{(t)}$  as the iterate generated from Algorithm 2. For  $f$  that is  $\mu_1$  and  $\mu_2$  strongly convex with respect for 1 and 2-norm. Let

$$\eta := \inf_{\mathbf{x} \in \mathbb{R}^d} \max \left\{ \frac{\mu_2}{L_{\max}} \frac{\|\nabla f(\mathbf{x})\|_{\mathcal{B}, \infty}^2}{\|\nabla f(\mathbf{x})\|_2^2}, \frac{\mu_1}{L_{\max}} \frac{\|\nabla f(\mathbf{x})\|_{\mathcal{B}, \infty}^2}{\|\nabla f(\mathbf{x})\|_{\infty}^2} \right\},$$

then with probability at least  $1 - \beta$ , we have

$$\mathbb{E}[f(\mathbf{x}^{(t)})] - f^* \leq \frac{\exp(-t\eta)}{\beta} (f(\mathbf{x}^0) - f^*).$$

Using Equation (1.5) and (Richtárik and Takác, 2014, Theorem 1), we can immediately get the following.

**Corollary 1.5.** Denote  $\mathbf{x}^{(t)}$  as the iterate generated from Algorithm 2. For convex objective  $f$ , with probability at least  $1 - \beta$ ,

$$\mathbb{E}[f(\mathbf{x}^{(t)})] - f^* = \mathcal{O} \left( \frac{L_{\max} D^2}{\eta^2 t} \left( 1 + \log \left( \frac{1}{\beta} \right) \right) \right),$$

where  $\rho := \inf_{\mathbf{x} \in \mathbb{R}^d} \{\|\nabla f(\mathbf{x})\|_{\mathcal{B}, \infty}^2 / \|\nabla f(\mathbf{x})\|_{\infty}^2\}$  and  $D = \sup_{\mathbf{x} \in \mathbb{R}^d} \{\|\mathbf{x} - \mathbf{x}^*\|_1 \mid f(\mathbf{x}) \leq f(\mathbf{x}^{(0)})\}$ .

## 2 PROXIMAL HYBRIDCD

Proximal hybridCD is a proximal-gradient variant of hybridCD. It aims to solve the composite problem

$$\min_{\mathbf{x} \in \mathbb{R}^d} f(x) + \sum_{i=1}^d g_i(\mathbf{x}_i).$$

The detailed algorithm is shown in Algorithm 1, where

$$\text{prox}_g(\mathbf{y}) := \arg \min_{\mathbf{x} \in \mathbb{R}^d} \frac{1}{2} \|\mathbf{y} - \mathbf{x}\|^2 + g(\mathbf{y})$$

is the standard definition of proximal operator and the GS-s rule is the greedy selection rule extended to composite problem, see Nutini et al. (2015) for more details.

## Bibliography

- Inderjit S. Dhillon, Pradeep Ravikumar, and Ambuj Tewari. Nearest neighbor based greedy coordinate descent. In *Advances in Neural Information Processing Systems (NIPS)*, pages 2160–2168, Granada, Spain, 2011.
- Sai Praneeth Karimireddy, Anastasia Koloskova, Sebastian U. Stich, and Martin Jaggi. Efficient greedy coordinate descent for composite problems. In *Proceedings of the 22nd International Conference on Artificial Intelligence and Statistics (AISTATS)*, pages 2887–2896, Naha, Okinawa, Japan, 2019.
- Haihao Lu, Robert M. Freund, and Vahab S. Mirrokni. Accelerating greedy coordinate descent methods. In *Proceedings of the 35th International Conference on Machine Learning (ICML)*, pages 3263–3272, Stockholmsmässan, Stockholm, Sweden, 2018.
- Julie Nutini, Mark Schmidt, Issam H. Laradji, Michael P. Friedlander, and Hoyt A. Koepke. Coordinate descent converges faster with the gauss-southwell rule than random selection. In *Proceedings of the 32nd International Conference on Machine Learning (ICML)*, pages 1632–1641, Lille, France, 2015.
- Peter Richtárik and Martin Takáč. Iteration complexity of randomized block-coordinate descent methods for minimizing a composite function. *Math. Program.*, 144(1-2):1–38, 2014.
- Mark Rudelson and Roman Vershynin. Non-asymptotic theory of random matrices: extreme singular values. In *Proceedings of the International Congress of Mathematicians 2010 (ICM 2010) (In 4 Volumes) Vol. I: Plenary Lectures and Ceremonies Vols. II–IV: Invited Lectures*, pages 1576–1602. World Scientific, 2010.
